# Supplementary material for: Temperature-dependent fasciation mutants provide a link between mitochondrial RNA processing and lateral root morphogenesis
Source: eLife. 2021 Jan 14;10:e61611. doi: 10.7554/eLife.61611 (PMC7846275; doi:10.7554/eLife.61611)
Supplement: Figure 1—source data 1. [file elife-61611-fig1-data1.xlsx]

## Sheet: Sheet1
Figure 1–source data 1 (Figure 1I, Raw data and supplement to transparent reporting form)
<Sample size estimation>
No explicit power analysis was used to estimate sample size prior to the experiment. As a rule of thumb, approximately 30 segments per strain were examined.
<Replicates>
No data were excluded from the analysis.
<Statistical reporting>
p-value (Kruskal-Wallis test)
0.337884
Raw data
WT 22°C	WT 28°C	rrd1 22°C	rrd1 28°C	rrd2 22°C	rrd2 28°C	rid4 22°C	rid4 28°C
1.28205	1.2966	1.3468	1.28205	1.02564	1.12994	1.5	1.65289
0.652174	1.43737	0.993377	1.85185	0.892857	1.23457	1.30293	1.66667
1.61765	1.16667	1.11111	1.34831	1.53846	1.02564	1.44928	1.14286
1.34615	0.879121	1.23077	1.34615	1.2012	0.909091	0.787402	1.34228
0.917431	1.46341	1.4827	1.44578	0.879765	0.881057	1.57068	1.08696
1.35135	1.68634	1.34907	1.53846	1.40845	0.930233	1.4218	1.66667
1.53846	1.44928	1.25	1.12045	1.02564	2.06186	1.5873	1.5544
1.15385	1.46341	0.857143	1.01523	0.555556	0.826446	1.6	1.23967
0.992908	1.07198	1.35593	1.23077	1.12045	1.89189	1.36986	1.37931
1.31868	1.23077	1.49254	1.16279	0.947867	0.881057	0.666667	1.53846
1.55979	1.41026	1.25	1.18483	1.14943	0.735294	1.66667	1.17647
1.6	1.05263	1.45833	1.60256	1.46341	0.879121	0.769231	1.0582
1.11888	0.97629	1.79372	1.26984	1.19048	1.73913	2.29358	1.02564
1.07692	1.34615	1.24069	1.00671	1.22549	1.62162	1.06383	1.63265
1.23077	1.2963	1.51261	1.12045	2.10526	1.57895	1.69492	1.04167
0.786517	1.38462	1.28205	1.25	1.28205	1.16279	1.71674	1.15385
1.46789	1.21212	1.31868	1.42857	1.41509	1.18483	1.1811	1.09589
1.11111	1.19658	1.10759	1.35922	1.14416	2	1.2766	1.03093
1.41509	1.31004	1.16279	1.09091	1.15385	1.28205	1.50376	1.14504
2.5	1.57895	1.15385	1.41093	1.26582	1.90476	0.990099	1.72414
0.956938	1.13208	1.10345	1.341	1.3468	1.373	1.17647	1.0989
	1.30435	1.42857	1.42857	0.993377	1.17188	1.23967	0.952381
	1.34933	1.14416	1.71233	1.11111	1.46699	1.57068	1.92308
		1.13208	1.44928	1.23077	1.26984	1.52672	1.02041
		1.26582	1.35397	1.45867	1.0274	1.46341	1.71233
			1.24654		1.12045	1.53846	1.53846
					1.23077	1.44231	1.15385
					1.45161	0.952381	1.53846
						1.44928
