# Supplementary material for: Temperature-dependent fasciation mutants provide a link between mitochondrial RNA processing and lateral root morphogenesis
Source: eLife. 2021 Jan 14;10:e61611. doi: 10.7554/eLife.61611 (PMC7846275; doi:10.7554/eLife.61611)
Supplement: Figure 3—source data 1. [file elife-61611-fig3-data1.xlsx]

## Sheet: Sheet1
Figure 3–source data 1 (Figure 3B, Raw data and supplement to transparent reporting form)
<Sample size estimation>
No explicit power analysis was used to estimate sample size prior to the experiment. 3 biological replicates were analyzed in order to allow statistical testing according to “Udvardi, M.K., Czechowski, T., and Scheible, W.R. (2008). Eleven golden rules of quantitative RT-PCR. Plant Cell 20, 1736–1737.”.
<Replicates>
This experiment was performed twice. The first experiment consisted of two biological replicates and the second experiment consisted of three biological replicates. The figure shows the data of the second experiment. The three biological replicates indicate samples prepared from three independent tissue cultures. No data were excluded from the analysis.
<Statistical reporting>
Oligo(dT) primer
Sample Number	Sample_Name	Target_Gene	p value (1 sample t test)	q value (BH adjusted) (P in figure legend)	q < 0.01	0.01 < q < 0.05	RQ_repA	RQ_repB	RQ_repC	RQ: Relative quantity
1	rrd1-oligo(dT)	cox1	0.0118495	0.0444358		*	14.2966	11.7098	10.1343
2	rrd1-oligo(dT)	cox2	0.0406192	0.082707			38.8253	31.0307	18.5112
3	rrd1-oligo(dT)	nad6	3.41e-05	0.0005115	**		12.3231	12.4198	12.5535
4	rrd1-oligo(dT)	cob	0.00135799	0.0101849		*	27.9985	25.4848	28.6886
5	rrd1-oligo(dT)	atp4	0.00252393	0.0126196		*	18.0742	17.1433	15.3541
6	rrd2-oligo(dT)	cox1	0.0721313	0.0983609			1.88099	1.3978	1.40646
7	rrd2-oligo(dT)	cox2	0.0846184	0.105773			2.65193	2.12243	1.48368
8	rrd2-oligo(dT)	nad6	0.054758	0.082707			1.0423	1.10454	1.07394
9	rrd2-oligo(dT)	cob	0.0546594	0.082707			1.58837	1.23327	1.52888
10	rrd2-oligo(dT)	atp4	0.982902	0.982902			1.12359	0.935195	0.936681
11	rid4-oligo(dT)	cox1	0.0991072	0.114354			1.66652	2.06768	1.27667
12	rid4-oligo(dT)	cox2	0.481842	0.51626			0.889523	1.74559	1.04241
13	rid4-oligo(dT)	nad6	0.0190238	0.0570713			1.28216	1.42354	1.46081
14	rid4-oligo(dT)	cob	0.055138	0.082707			1.27168	1.50561	1.24236
15	rid4-oligo(dT)	atp4	0.0320906	0.0802265			1.15126	1.13659	1.24
Random 6mer primer
Sample Number	Sample_Name	Target_Gene	p value (1 sample t test)	q value (BH adjusted) (P in figure legend)	q < 0.01	0.01 < q < 0.05	RQ_repA	RQ_repB	RQ_repC	RQ: Relative quantity
1	rrd1-6mer	cox1	0.00228236	0.0342354		*	0.603068	0.535844	0.587499
2	rrd1-6mer	cox2	0.108199	0.195216			0.824745	0.701408	0.927432
3	rrd1-6mer	nad6	0.036995	0.138731			0.84226	0.694641	0.798921
4	rrd1-6mer	cob	0.141216	0.195216			0.914566	0.933003	0.75828
5	rrd1-6mer	atp4	0.0308246	0.138731			0.639663	0.556715	0.769611
6	rrd2-6mer	cox1	0.116429	0.195216			0.670568	0.941633	0.696408
7	rrd2-6mer	cox2	0.092962	0.195216			0.629779	0.851894	0.847797
8	rrd2-6mer	nad6	0.143158	0.195216			0.626631	0.935184	0.807136
9	rrd2-6mer	cob	0.124873	0.195216			0.74176	0.951186	0.843104
10	rrd2-6mer	atp4	0.0249247	0.138731			0.400533	0.664329	0.505316
11	rid4-6mer	cox1	0.621353	0.665735			0.972184	0.949579	1.24029
12	rid4-6mer	cox2	0.777735	0.777735			0.910369	0.845949	1.41896
13	rid4-6mer	nad6	0.177541	0.221927			1.0608	1.20149	1.46564
14	rid4-6mer	cob	0.364351	0.420405			0.807381	0.963073	1.01313
15	rid4-6mer	atp4	0.0977408	0.195216			0.600187	0.50744	0.884721
