# Supplementary material for: Temperature-dependent fasciation mutants provide a link between mitochondrial RNA processing and lateral root morphogenesis
Source: eLife. 2021 Jan 14;10:e61611. doi: 10.7554/eLife.61611 (PMC7846275; doi:10.7554/eLife.61611)
Supplement: Figure 4—source data 1. [file elife-61611-fig4-data1.xlsx]

## Sheet: Sheet1
Figure 4–source data 1 (Figure 4B, Supplement to transparent reporting form)
<Sample size estimation>
No explicit power analysis was used to estimate sample size prior to the experiment. As a rule of thumb, approximately 30 LRs per strain were examined.
<Replicates>
This experiment was performed twice to confirm the reproducibility. The figure shows the data of the second experiment, in which five explants were used for each strain to examine approximately 30 LRs in total. For rrd1 ags1 and rrd1 AGS1(Col), data were gathered from 7 strains, considering that the genetic background of these genotypes was a mixture of Ler and Col.
<Statistical reporting>
Number of LRs
1. rrd1 ags1 #1-9	39
2. rrd1 ags1 #1-11	32
3. rrd1 ags1 #1-18	39
4. rrd1 ags1 #1-28	36
5. rrd1 ags1 #2-1	36
6. rrd1 ags1 #2-2	42
7. rrd1 ags1 #2-3	37
8. rrd1 AGS1 (Col) #1-11	30
9. rrd1 AGS1 (Col) #1-43	29
10. rrd1 AGS1 (Col) #1-49	36
11. rrd1 AGS1 (Col) #1-72	28
12. rrd1 AGS1 (Col) #2-1	35
13. rrd1 AGS1 (Col) #2-2	40
14. rrd1 AGS1 (Col) #2-3	41
15. LerWT	31
16. rrd1	22
17. ColWT	37
18. ags1	43
q-values (pair-wise Mann–Whitney–Wilcoxon test with Bonferroni correction) (P in figure legend)
	rrd1 ags1	rrd1 AGS1 (Col)	LerWT	rrd1	ColWT
rrd1 AGS1 (Col)	1.02549e-05
LerWT	0.431282	1
rrd1	4.65954e-08	4.60182e-06	0.00251191
ColWT	1	0.000366835	0.04502	3.04971e-06
ags1	0.00364103	3.23091e-07	0.00131625	3.07393e-07	1
effect size
rrd1 ags1 vs rrd1 AGS1 (Col)	0.222
