# Supplementary material for: Temperature-dependent fasciation mutants provide a link between mitochondrial RNA processing and lateral root morphogenesis
Source: eLife. 2021 Jan 14;10:e61611. doi: 10.7554/eLife.61611 (PMC7846275; doi:10.7554/eLife.61611)
Supplement: Figure 5—source data 1. [file elife-61611-fig5-data1.xlsx]

## Sheet: Sheet1
Figure 5–source data 1 (Figure 5C, Raw data and supplement to transparent reporting form)
<Sample size estimation>
No explicit power analysis was used to estimate sample size prior to the experiment. In order to allow statistical testing while also considering the labor intensity of mitochondria isolation, 3 biological replicates were analyzed.
<Replicates>
This experiment was performed in three biological replicates. The three biological replicates indicate that samples were prepared from three independent sets of callus cultures and processed independently.
<Statistical reporting>
raw data (relative quantity)
LerWT 22°C	1	1	1
rrd2 22°C	1.0549	0.883056	0.609228
LerWT 28°C	1.75363	1.69575	0.948852
rrd2 28°C	0.753	0.823141	1.05534
p-values
LerWT 22°C vs rrd2 22°C (1 sample t test)	0.3648
LerWT 28°C vs rrd2 28°C (Welch's t test)	0.1398
