# Supplementary material for: Temperature-dependent fasciation mutants provide a link between mitochondrial RNA processing and lateral root morphogenesis
Source: eLife. 2021 Jan 14;10:e61611. doi: 10.7554/eLife.61611 (PMC7846275; doi:10.7554/eLife.61611)
Supplement: Figure 5—source data 2. [file elife-61611-fig5-data2.xlsx]

## Sheet: Sheet1
Figure 5–source data 2 (Figure 5E, Raw data and supplement to transparent reporting form)
<Sample size estimation>
No explicit power analysis was used to estimate sample size prior to the experiment. In order to ensure the reproducibility of the data, while also considering the labor intensity of mitochondria isolation, 2 biological replicates were analyzed.
<Replicates>
This experiment was performed in two biological replicates. The two biological replicates indicate that samples were prepared from three independent sets of callus cultures and processed independently.
<Statistical reporting>
raw data (relative quantity)
LerWT 28°C	1	1
rrd2 28°C	0.255135	0.193616
p-value
LerWT 28°C vs rrd2 28°C (1 sample t test)	0.02523
