# Supplementary material for: Temperature-dependent fasciation mutants provide a link between mitochondrial RNA processing and lateral root morphogenesis
Source: eLife. 2021 Jan 14;10:e61611. doi: 10.7554/eLife.61611 (PMC7846275; doi:10.7554/eLife.61611)
Supplement: Figure 6—source data 1. [file elife-61611-fig6-data1.xlsx]

## Sheet: Sheet1
Figure 6–source data 1 (Figure 6A to F, Supplement to transparent reporting form)
<Sample size estimation>
No explicit power analysis was used to estimate sample size prior to the experiment. As a rule of thumb, approximately 30 to 60 LRs per strain were examined.
<Replicates>
This experiment was performed three times to confirm the reproducibility. The figure shows the data of the third experiment, in which 10 to 12 explants were used for each strain to examine approximately 30 to 60 LRs in total.
<Statistical reporting>
Number of LRs
Fig. 5A
Rotenone 0 µM	65
Rotenone 10 µM	64
Fig. 5B
Antimycin A 0 µM	64
Antimycin A 10 µM	53
Fig. 5C
Oligomycin 0 µg/mL	76
Oligomycin 10 µg/mL	30
Fig. 5E
CCCP 0 µM	53
CCCP 0.5 µM	41
CCCP 1 µM	39
CCCP 2 µM	42
CCCP 5 µM	2
p-values & effect size
	p value	effect size (r)
Fig. 5A	0.00304711	0.261
Fig. 5B	0.007083	0.227
Fig. 5C	1.193e-06	0.472
	p value
Fig. 5E	0.148
Fig. 5F	p value
CCCP 0.5 µM	0.318756
CCCP 1 µM	0.0050609
CCCP 2 µM	3.74162e-05
CCCP 5 µM	1.11022e-16
