# Supplementary material for: Temperature-dependent fasciation mutants provide a link between mitochondrial RNA processing and lateral root morphogenesis
Source: eLife. 2021 Jan 14;10:e61611. doi: 10.7554/eLife.61611 (PMC7846275; doi:10.7554/eLife.61611)
Supplement: Figure 6—source data 2. [file elife-61611-fig6-data2.xlsx]

## Sheet: Sheet1
Figure 6–source data 1 (Figure 6G, Supplement to transparent reporting form)
<Sample size estimation>
No explicit power analysis was used to estimate sample size prior to the experiment. As a rule of thumb, approximately 30 LRs per strain were examined.
<Replicates>
This experiment was performed three times to confirm the reproducibility. The figure shows the data of the third experiment, in which 4 to 6 explants were used for each strain to examine approximately 30 LRs in total.
<Statistical reporting>
Number of LRs
WT 0mM	46
WT 2mM	20
rid4-2 0mM	58
rid4-2 2mM	16
WT+PQ 0mM	33
WT+PQ 2mM	18
q-values (pair-wise Mann–Whitney–Wilcoxon test with Bonferroni correction) (P in figure legend)
	WT 0mM	WT 2mM	rid4-2 0mM	rid4-2 2mM	WT+PQ 0mM
WT 2mM	3.25354e-05
rid4-2 0mM	0.000319335	1.02513e-06
rid4-2 2mM	0.00021808	1	1.00456e-05
WT+PQ 0mM	0.000765667	7.18457e-07	1	6.90326e-06
WT+PQ 2mM	0.000804646	1	7.93725e-06	1	1.18721e-05
effect size
WT 0 mM vs rid4-2 0 mM	0.417
WT 0 mM vs WT+PQ 0 mM	0.457
