# Supplementary material for: Temperature-dependent fasciation mutants provide a link between mitochondrial RNA processing and lateral root morphogenesis
Source: eLife. 2021 Jan 14;10:e61611. doi: 10.7554/eLife.61611 (PMC7846275; doi:10.7554/eLife.61611)
Supplement: Supplementary file 1. [file elife-61611-supp1.xlsx]

## Sheet: Gentyping
mutation	primer name	primer sequence	Restriction enzyme	product
rrd1	dCAPS-rrd1_F	GGAGCTCTGCTATTTTGGTGTTTCG	TaqI	WT = 107 bp, rrd1 = 24 + 83 bp
	dCAPS-rrd1_R	CTGCAACCATCTCTCTTAATGAACC
rrd2	dCAPS-rrd2(NruI)_F	ATGCCTGAGAGAAATGTGGTTTCGCG	NruI	WT = 98 bp, rrd2 = 24 + 74 bp
	dCAPS-rrd2(NruI)_R	GGCATAGCATCAAACACCTGTTTCGC
rid4-1	2g33680-1F	AACAACGACTCAGTGAGTAC	MvaI	WT = 409 + 732 bp, rid4 = 1,141 bp
	2g33680-1R	AACAATCGTGTATTCACTGG
rid4-2	dCAPS-rid4-2-F	GTCGAGTCTTCAAAGTTCTACAGCT	XspI	WT = 45 + 68 bp, rid4-2 = 25 + 20 + 68 bp
	dCAPS-rid4-2-R	CTTTACAGTACATGCCCACCAAC
ags1-1	AGS1F5	CATCTCTATCAAGTTCCTTGATGC	XmnI	ColWT = 153bp, LerWT = 97 + 56bp, ags1-1= 131 + 22bp
	ags1-1dCAPS3	GGTTGATCGCAGGAAACGAATTTAT

## Sheet: RACE-PAT assay
primer name	primer sequence	Usage
T7-Oligo(dT)24	GGCCAGTGAATTGTAATACGACTCACTATAGGGAGGCGGTTTTTTTTTTTTTTTTTTTTTTTT	RT
T7-promoter	GTAATACGACTCACTATAGGG	PCR
At2g07707_GS-FW1	AAGTGGCTCACGAGGAATGGAA	PCR, atp8
At2g07727_GS-FW1	CCTGTGGAGGCTCCATTTGTTACT	PCR, cob
cox1_GS-FW1	GGAGAACTTCCAGCTATCAAGG	PCR, cox1
COX2_GS-FW1	GGCTTGTATGGCAGGAATACCACT	PCR, cox2
nad6_GS-FW1	GGGGCTATAGTACTGACTATGC	PCR, nad6
nad9_GS-FW1	GTGGAAGTACGCTATGATGATCC	PCR, nad9
beta-TUBULIN_FWD	GAGGGAGCCATTGACAACATCTT	PCR, β-TUB4,control
beta-TUBULIN_Re	GCGAACAGTTCACAGCTATGTTCA

## Sheet: CR-RT PCR
Primer name	Primer sequence	usage
Atcox1-1	CCCACCAAGAATTTGATCG	Reverse Transcription
Atcox1-5'(-176..-196)	TGCTAGGAACGCTAGCTCATG	for PCR
Atcox1-3'(+17..+38)	CGACTGCTACTAAGAACCTAAC	for PCR
M13 Reverse	CAGGAAACAGCTATGAC	for sequencing

## Sheet: qRT-PCR
Primer name	Primer sequence	gene
beta-TUBULIN_FWD	GAGGGAGCCATTGACAACATCTT	β-TUB4
beta-TUBULIN_Re	GCGAACAGTTCACAGCTATGTTCA
cox1-qRT-FWD	GGGCTAGACATTGCTCTACATG	cox1
cox1-qRT-Re	TTCAGGGTATGTCCGACCAAAG
COX2-qRT-FWD	GTGATGCTGTACCTGGTCGTTT	cox2
COX2-qRT-Re	GGAACAGCTTCTACGACGATAG
nad6-qRT-FWD	GTTTATGCCGGAAAGGTACGAAG	nad6
nad6-qRT-Re	ACTATAGCCCCAATCATGGCTAC
2g07727-qRT-FWD	TGGCGGATTGCTTACTACTAGG	cob
2g07727-qRT-Re	CAGAATGGGCGTTATGGCAAAG
orf25-qRT-FWD	CTCCAGGCTATTCAGGAAGAA	atp4
orf25-qRT-Re	CTACTACGGTGCCACAAATTC

## Sheet: Editing analysis (PCR)
Primers for amplifying cDNA of mitochondrial genes
gene	product size	forward primer name	forward primer sequence	reverse primer name	reverse primer sequence
atp1	1507	atp1Fw1	AGCTGCGGAACTAACGAATCTATTCGA	atp1Rv1	CTAAATTAAAGCTAAAGCTCTTTCTTTTAAGA
atp4	489	atp4Fw1	GCTGCTATTCTATCTATTTGTGCATTAAGTTCGA	atp4Rv1	CTCTCGAATGAATTCTACTCTTTC
atp6	857	atp6Fw1	AAGTGTGAGGCATTAACGCA	atp6Rv1	CCTAATTCCAGACCGGTTAATGCA
atp9	257	atp9Fw1	ATGACAAAGCGTGAGTATAATTCTC	atp9Rv1	CAGAATACGAATAAGATCAAAAAGGCCA
ccb2	621	ccb2Fw	CAGCCTTGAAGTGAATGAATT	ccb2Rv	TTAATCTTGTAAACTAATCGAGACC
ccb3	740	ccb3Fw	CTACGCGCAAATTCTCATTGG	ccb3Rv	GAGCGAGTGAACTAGGTTTTGGTA
ccb6c	1350	ccb6cFw	GGTCCAACTACATAACTTTTTCTT	ccb6cRv	ATTATGAACTCCACGGAACTTTCT
ccb6c	1356	ccb6cFw2	ATGGTCCAACTACATAACTT	ccb6cRv2	TGCAATTATGAACTCCACGGAA
ccb6n-A	511	ccb6n-A_Fw4	GCGCCGCTTTATCCTGAAAG	ccb6n-A_Rv4	CAGGATAGCATTTTGCGCCC
ccb6n-A	561	ccb6n-A_Fw5	AAACAACCACCAGCGTTTGG	ccb6n-A_Rv5	ATCTCGTGCCAGATGCAACA
ccb6n-A	205	ccb6n-A_Fw1	ATGTCAATATCAATATATGAATTCTTTCAT	ccb6n-A_Rv7	AGAAAGGTGCATTAGCGGTT
ccb6n_B	547	ccb6n-Bfw1	CGAAGCGTGTCGTTCGTAAT	ccb6n-Brv1	GAGTGACGTAGATGCACAAGA
cob	1136	cobFw1	GACTATAAGGAACCAACGAT	cobRv1	ATCAGTCTCATCCGTGTAAG
cox2	760	cox2Fw2	ATGATTGTTCTAAAATGGTTATT	cox2Rv1	TTAATTGATTGGATACCCGAGAACC
cox3	798	cox3Fw1	ATGATTGAATCTCAGAGGCATTC	cox3Rv1	TCATATACCTCCCCACCAATAG
matR	574	matR_Fw2	GGTTGAAGTTTAGACCGCTCAC	matR_Rv2	ATGCTCTTAACGCTCCCCAC
matR	512	matR_Fw3	CTTGCATAGCTCAGGTCGGA	matR_Rv3	TGTTGGGGAACTCTGCAAGG
nad1	948	nad1Fw	CCAGCTGAAATACTTGGAATAAT	nad1Rv	AAAGGTGACTAAAAGACCAGAAAC
nad1a	372	nad1aFw1	GTACATAGCTGTTCCAGCTGA	nad1aRv	CCCGCTATAATAATTCCATAAACAC
nad1b	269	nad1bFw	TCGAAATATGCCTTTCTAGGAG	nad1bRv	TCTACATTATAGCCTGCAACT
nad1c	316	nad1cFw	TCTTCAATGGGGTCTGCTCT	nad1cRv	AAGGAAGCCATTGAAAGGTG
nad2a	560	nad2aFw1	CAGAATTCGTTCGGATCCTC	nad2aRv1	TATTCCAGAGGAAAATGCAC
nad2b	881	nad2bFw1	CTTCGATCAATTAGCCAAGA	nad2bRv1	GATATGAACTGAGTGCCATT
nad3	360	nad3Fw1	ATGATGTCAGAATTTGCACCAAT	nad3Rv	TTACTCCCGATCCGAAGCAC
nad4	1482	nad4Fw4	GTTAGAACATTTCTGTGAATGCT	nad4Rv1	TGAAATTTGCCATGTTGCAC
nad4L	278	nad4LFw1	TGGATCTTATCAAATATTTCACATTTTCT	nad4LRv1	TTCTACAGCAATAGTACCTC
nad5a	1425	nad5aFw3	TTTGCCCCTGCTCGGTAGTTC	nad5aRv1	TTGGCCAAGTATCCTACAAAGAGAC
nad5c	497	nad5cFw2	CCAATTTTTGGGCCAATTCC	nad5cRv1	GAAAGACGATCGATTATCTACCCA
nad6	618	nad6Fw1	ATGATACTTTCTGTTTTGTCGAGC	nad6Rv1	TTAGTAGATCGTGAGTGGGTCA
nad7	1171	nad7Fw1	ATGACGACTAGGAAAAGGCA	nad7Rv1	CTCCAAACACAATATCTTGAGTACC
nad9	523	nad9Fw1	ACTTTACCCAAGAAATGGGTC	nad9Rv1	GCTGTTCCCAAGGACTAGC
orf240	696	orf240Fw1	ATGCGTAGTAGCGTTCTAAGATCACT	orf240Rv1	CAACCAGGACCTTTGGACCTC
orfX	861	orfXFw1	AATCCTTCACTTTTAGCTTTGAATTACT	orfXRv1	TCATTGATAGTTACTTTGCCAGGT
rpl16	540	rpl16fw2	ATGTATTTAACCATAAAATCGATTATGCT	rpl16Rv1	TTACGACCACTGAACAAACTTGGTTG
rpl2	1050	rpl2Fw1	ATGAGACCAGGGAGAGCAAG	rpl2Rv1	TCACACAGTGAATAAGGGCTTAGG
rpl5	558	rpl5Fw1	ATGTTTCCACTCAATTTTCATTACG	rpl5Rv1	TTACTGAGTTTCCCCCTCATC
rps12	378	rps12Fw1	ATGCCCACGTTTAATCAATTGA	rps12rv1	TCATATCGATTTGGGTTTTTCTGCACCA
rps3	1665	rps3Fw2	ATGGCACGAAAAGGAAATCCGATT	rps3Rv2	TTCGTACGTTTCGGATATAGCACGTC
rps4	1089	rps4Fw1	ATGTGGCTGCTTAAAAAACTGAT	rps4Rv1	TTATATGTTTTGGCCACGTCC
rps7	283	rps7Fw1	TAATCAAACTTATGGTTGACGCC	rps7Rv1	CGATTGGTGGAAGCCAGTCC
rps14 (φ)	234	pseudorps14Fw1	ACGTAGATTGCTCGCGGCT	pseudorps14Rv1	TCGAGATGCTAATCCACGAA

## Sheet: Editing analysis (Sequencing)
Primers for sequencing cDNA of mitochondrial genes
gene	forward primer name	forward primer sequence
atp1	atp1Fw2	GCTCAGTTGAAAGCTATGAAACAAG
atp1	atp1Rv1	CTAAATTAAAGCTAAAGCTCTTTCTTTTAAGA
atp4	atp4Fw1	GCTGCTATTCTATCTATTTGTGCATTAAGTTCGA
atp4	atp4Rv1	CTCTCGAATGAATTCTACTCTTTC
atp6	atp6fw2	GGGCTTGATTTTGGGCGAAG
atp6	atp6rv2	TAGTCCAAGCGAACCCACTT
atp9	atp9Fw1	ATGACAAAGCGTGAGTATAATTCTC
atp9	atp9Rv1	CAGAATACGAATAAGATCAAAAAGGCCA
ccb2	ccb2Fw	CAGCCTTGAAGTGAATGAATT
ccb2	ccb2Rv	TTAATCTTGTAAACTAATCGAGACC
ccb2	ccb2Fw1	ATGAGACGACTTTTTCTTGAACTAT
ccb2	ccb2_Fw3	TGCTTGCCAAAGATCCTACTTC
ccb2	ccb2_Fw5	CGTCGTAACGCCCTTAATGC
ccb2	ccb2_Fw7	TCCAGCAGTGGTTGGAACAG
ccb3	ccb3Fw	CTACGCGCAAATTCTCATTGG
ccb3	ccb3_Fw3	TGGGATGCTCGTTTGACCTC
ccb3	ccb3_Rv4	GAGGTCAAACGAGCATCCCA
ccb6c	ccb6cFw1	TCAGAGCAAGTCGCCCTATT
ccb6c	ccb6cFw2	ATGGTCCAACTACATAACTT
ccb6c	ccb6cFw3	TTACATGGACCCACTTTTCATTC
ccb6n-A	ccb6n-A_Fw4	GCGCCGCTTTATCCTGAAAG
ccb6n-A	ccb6n-A_Fw5	AAACAACCACCAGCGTTTGG
ccb6n-A	ccb6n-A_Rv5	ATCTCGTGCCAGATGCAACA
ccb6n-A	ccb6n-A_Rv7	AGAAAGGTGCATTAGCGGTT
ccb6n-B	ccb6n-Bfw1	CGAAGCGTGTCGTTCGTAAT
ccb6n-B	ccb6n-Brv1	GAGTGACGTAGATGCACAAGA
ccb6n-B	ccb6nB_Rv3	AGCATTTTCTACGGGATCCC
cob	cobRv1	AGGTGTGATCAGTCTCATCCGTGT
cob	cob_Fw4	AGGAACCAACGATTCTCTCTTCT
cox2	cox2Fw1	CTCTTATACTCAATGGACGAGGTAG
cox2	cox2Fw2	ATGATTGTTCTAAAATGGTTATT
cox2	cox2Rv1	TTAATTGATTGGATACCCGAGAACC
cox2	cox2Rv2	GTCCATTGAGTATAAGAGAGCAAA
cox3	cox3Fw1	ATGATTGAATCTCAGAGGCATTC
cox3	cox3Rv1	TCATATACCTCCCCACCAATAG
matR	matR_Fw2	GGTTGAAGTTTAGACCGCTCAC
matR	matR_Fw3	CTTGCATAGCTCAGGTCGGA
nad1	nad1aFw1	GTACATAGCTGTTCCAGCTGA
nad1	nad1aRv	CCCGCTATAATAATTCCATAAACAC
nad1	nad1Fw	CCAGCTGAAATACTTGGAATAAT
nad1	nad1bFw	TCGAAATATGCCTTTCTAGGAG
nad1	nad1bRv	TCTACATTATAGCCTGCAACT
nad1	nad1c_Fw2	GTTCTTTCTAGGAGGTTGGC
nad1	nad1cRv	AAGGAAGCCATTGAAAGGTG
nad2	nad2aFw1	CAGAATTCGTTCGGATCCTC
nad2	nad2aRv2	CATCGAAATGGTACCAGCCG
nad2	nad2bFw1	CTTCGATCAATTAGCCAAGA
nad2	nad2bRv2	TTGACTTTCGTTTGGGCCA
nad3	nad3Fw1	ATGATGTCAGAATTTGCACCAAT
nad3	nad3Rv	TTACTCCCGATCCGAAGCAC
nad4	nad4Fw1	AGTGGTCTTATTCTGTGTCCT
nad4	nad4Fw2	AAGATCAAGGCAGCATATCAGT
nad4	nad4Fw3	CATTGCTTACTCCTCAGTAGCCCATA
nad4	nad4Fw4	GTTAGAACATTTCTGTGAATGCT
nad4	nad4Rv1	TGAAATTTGCCATGTTGCAC
nad4	nad4Rv2	AGATTTGGCCGTAGA
nad4L	nad4LFw1	TGGATCTTATCAAATATTTCACATTTTCT
nad4L	nad4LRv1	TTCTACAGCAATAGTACCTC
nad5a	nad5aFw1	GCTCCATGGATCTCATCGGAA
nad5a	nad5a_Rv2	GGATTTCCCAACAGCACCAATA
nad5c	nad5cFw3	GCTGGTTCTTCGATCAAGTTT
nad5c	nad5cRv1	GAAAGACGATCGATTATCTACCCA
nad7	nad7Fw1	ATGACGACTAGGAAAAGGCA
nad7	nad7Fw2	ATCTGCCTCTTGGCTTATGT
nad7	nad7Rv2	CTCGTAATGGTACCTCGCAATTCA
nad9	nad9Fw1	ACTTTACCCAAGAAATGGGTC
nad9	nad9Rv1	GCTGTTCCCAAGGACTAGC
orf240A	orf240Fw1	ATGCGTAGTAGCGTTCTAAGATCACT
orf240A	orf240Rv1	CAACCAGGACCTTTGGACCTC
orfX	orfXFw1	AATCCTTCACTTTTAGCTTTGAATTACT
orfX	orfXFw2	TACTTCGTGGGTGCAACATCAACA
orfX	orfXFw3	ACGGAGGCCTTTTCGACATT
orfX	orfXRv2	TGTTCTCCATAGCAACTGGGG
rpl2	rpl2Fw1	ATGAGACCAGGGAGAGCAAG
rpl2	rpl2Rv1	TCACACAGTGAATAAGGGCTTAGG
rpl5	rpl5Fw1	ATGTTTCCACTCAATTTTCATTACG
rpl5	rpl5Rv1	TTACTGAGTTTCCCCCTCATC
rpl5	rpl5 Rv2	AGACATTCCATGCCCTCGGAG
rpl16	rpl16fw2	ATGTATTTAACCATAAAATCGATTATGCT
rpl16	rpl16Rv1	TTACGACCACTGAACAAACTTGGTTG
rpl16	rpl16Rv	CGGTAATAGGGAGATCCGCG
rps3	rps3Fw3	CGATCAGGCTCGACGACCG
rps3	rps3Fw4	ACTAAGACCTTAATTGAGTCAGTCA
rps3	rps3Rv1	ATATACGGATTCCCTCCACCCCTTT
rps3	rps3Rv3	CCCCGGATTTCGTTTTGCT
rps4	rps4Fw2	CCCTATTCTTATCGAAGAGAAGGAA
rps4	rps4Rv1	TTATATGTTTTGGCCACGTCC
rps4	rps4Rv2	TTTAGTAGTAGGCGGCATCC
rps4	rps4Rv3	TGAAGTTCGTTTTGTTCCTCTG
rps7	rps7Fw1	TAATCAAACTTATGGTTGACGCC
rps7	rps7Rv1	CGATTGGTGGAAGCCAGTCC
rps12	rps12Fw1	ATGCCCACGTTTAATCAATTGA
rps12	rps12rv1	TCATATCGATTTGGGTTTTTCTGCACCA
rps14 (φ)	pseudorps14Fw1	ACGTAGATTGCTCGCGGCT
rps14 (φ)	pseudorps14Rv1	TCGAGATGCTAATCCACGAA
